# Supplementary figures and images for: Reconstitution of Human Keloids in Mouse Skin
Source: PubMed Central journal article supplement — Plast Reconstr Surg Glob Open. 2017 Apr 25;5(4):e1304. doi: 10.1097/GOX.0000000000001304 (PMC5426884; doi:10.1097/gox.0000000000001304), 2017-04-25

Normal skin-derived

White scar-derived

Keloid-derived

Vimentin

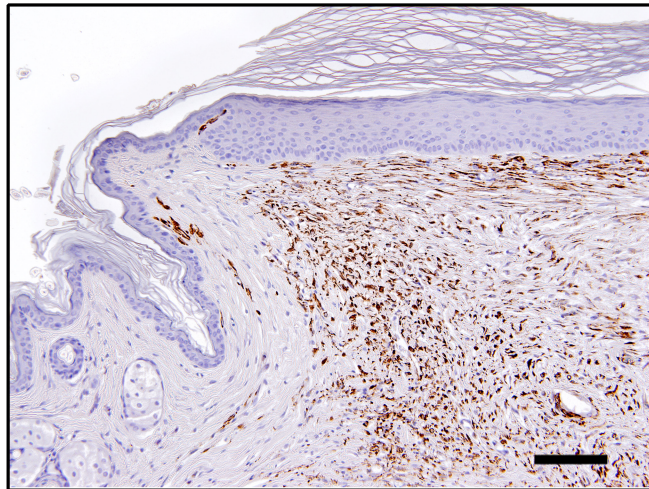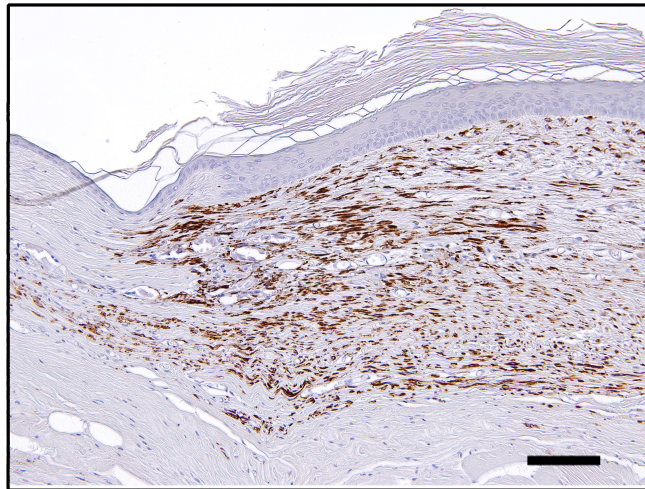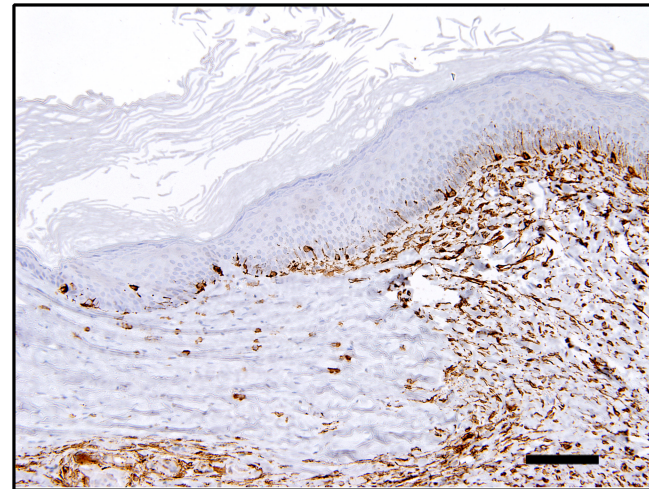

Collagen type3

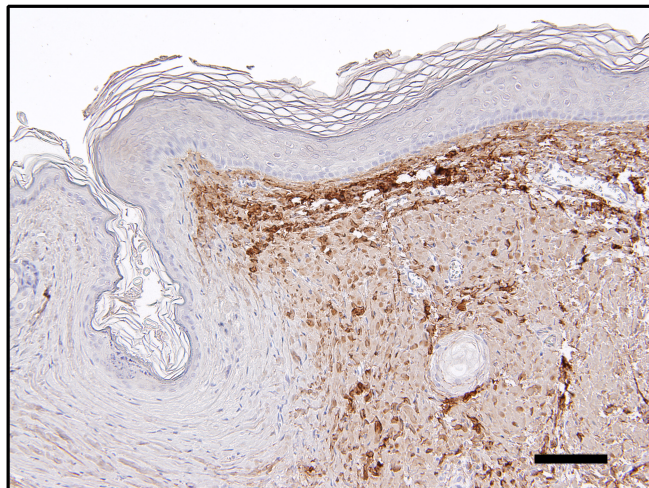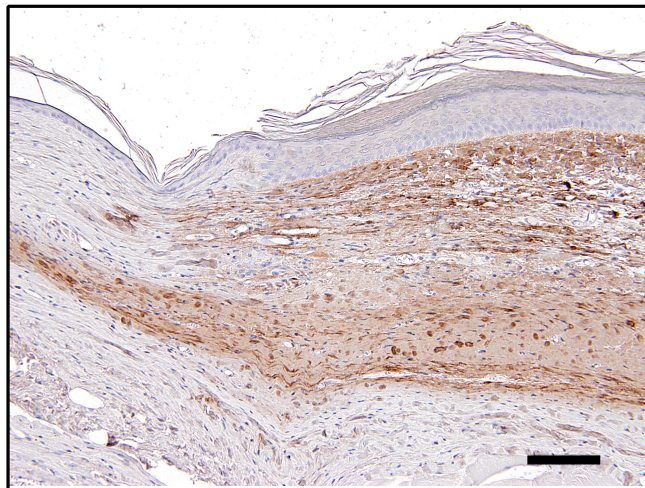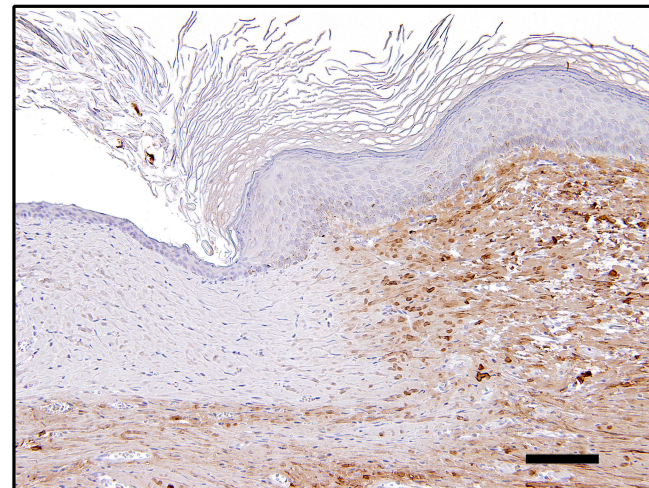

Supplement: gox-5-e1304-s002.pdf [file gox-5-e1304-s002.pdf]

Normal skin

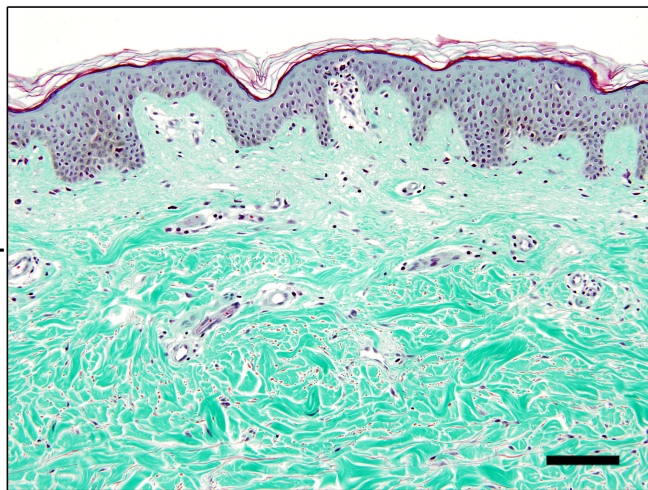

White scar

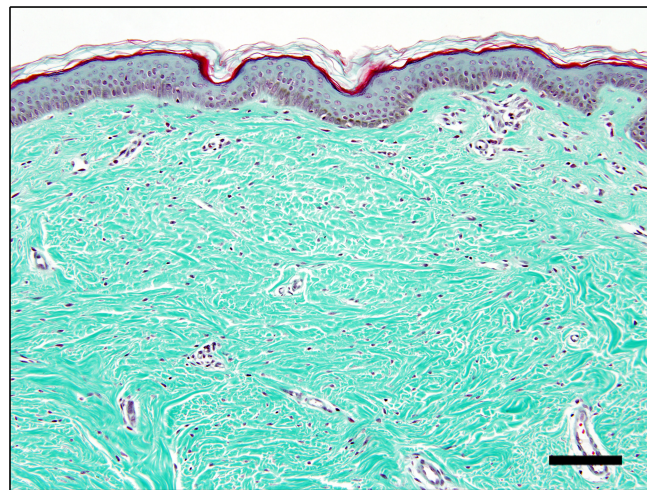

Keloid

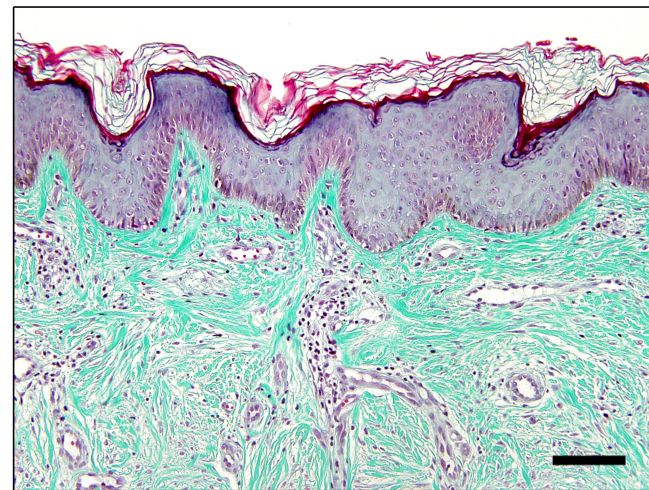

Reconstituted skins

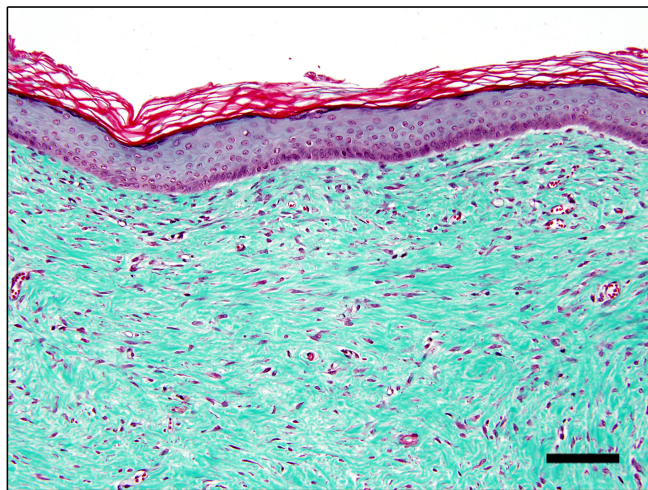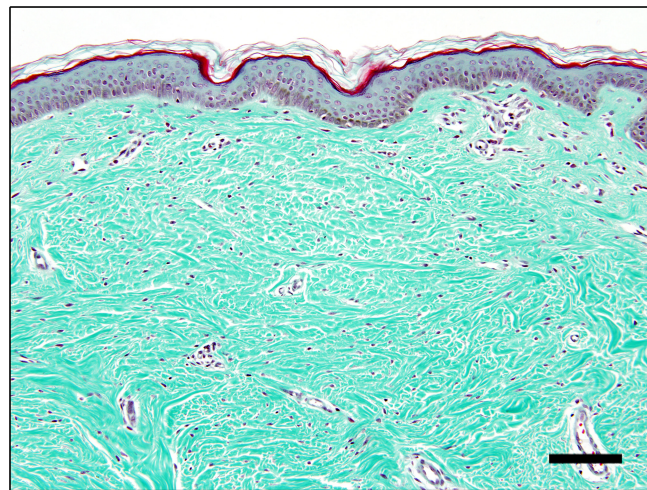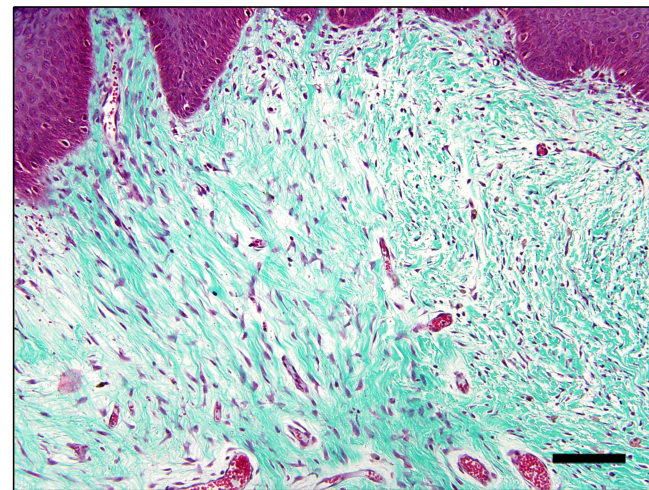

Supplement: gox-5-e1304-s003.pdf [file gox-5-e1304-s003.pdf]

Human specimens

Normal skin

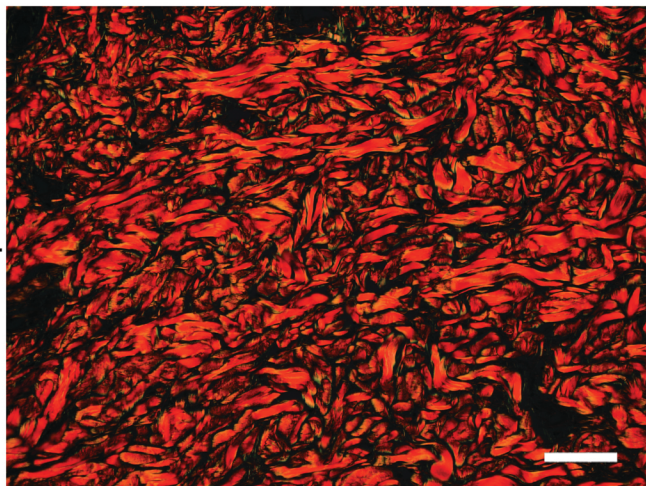

White scar

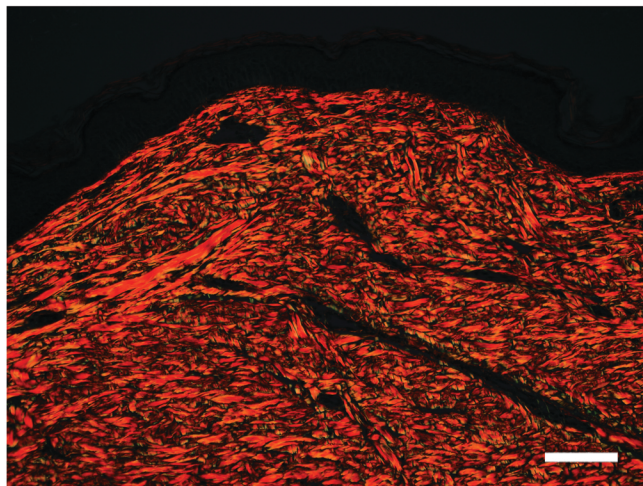

Keloid

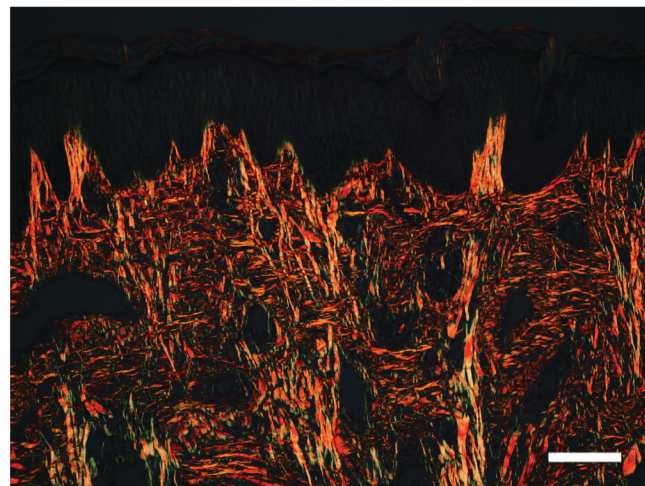

Reconstituted skins

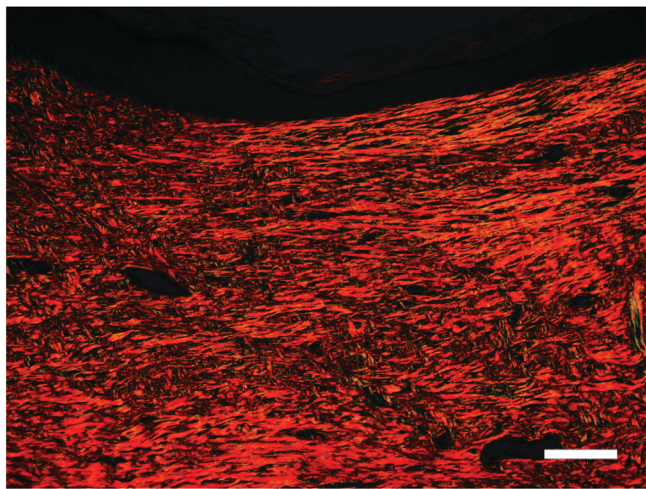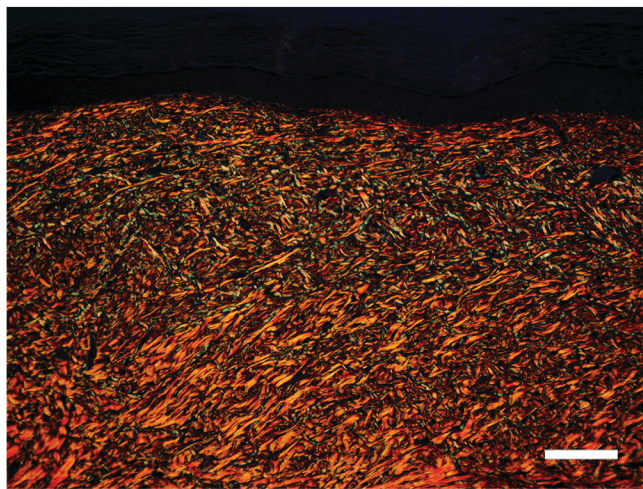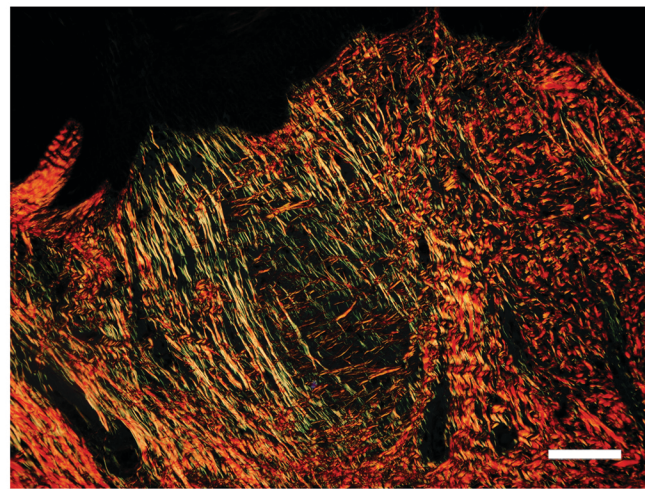

Supplement: gox-5-e1304-s004.pdf [file gox-5-e1304-s004.pdf]

Normal skin

White scar

Keloid

Human specimens

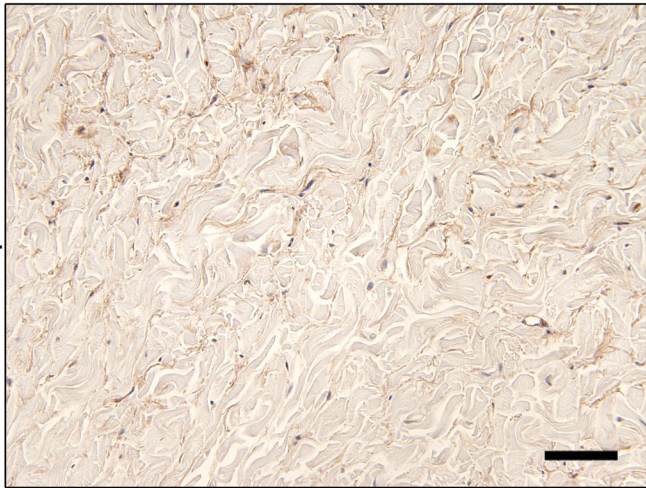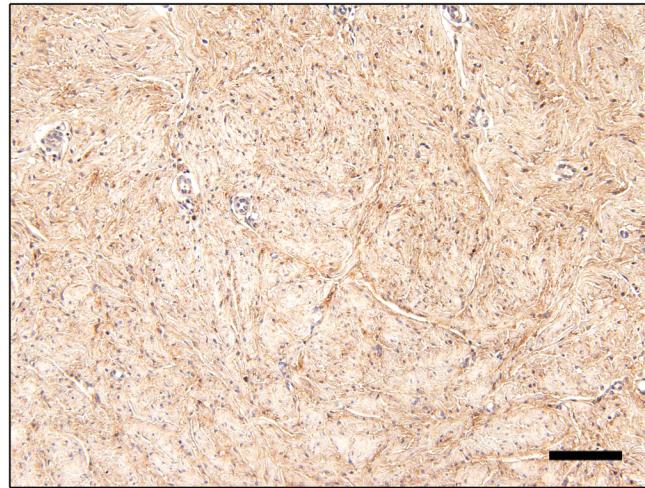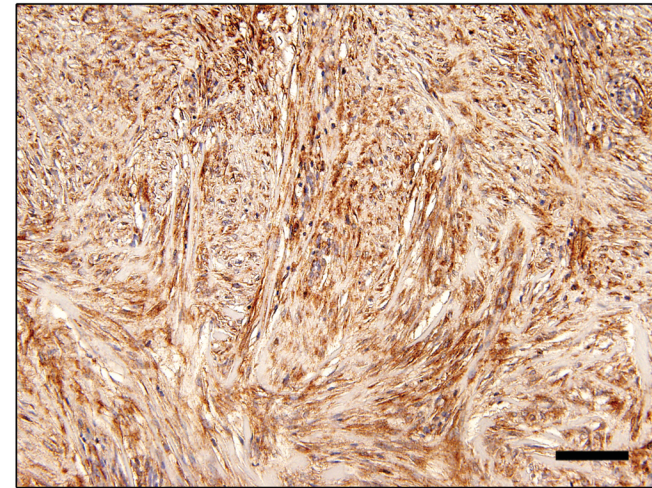

Reconstituted skins

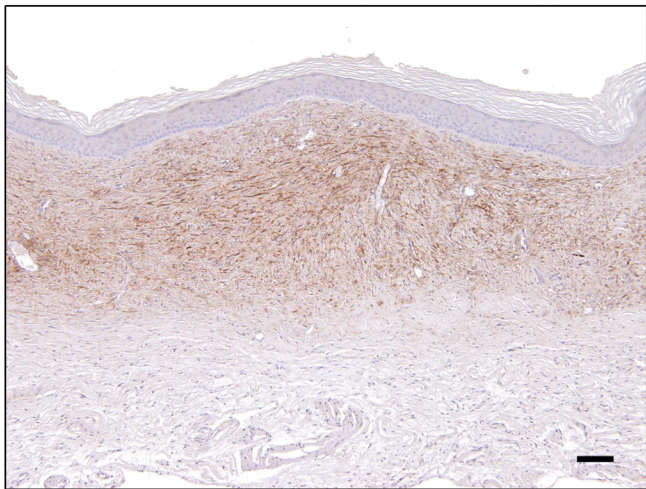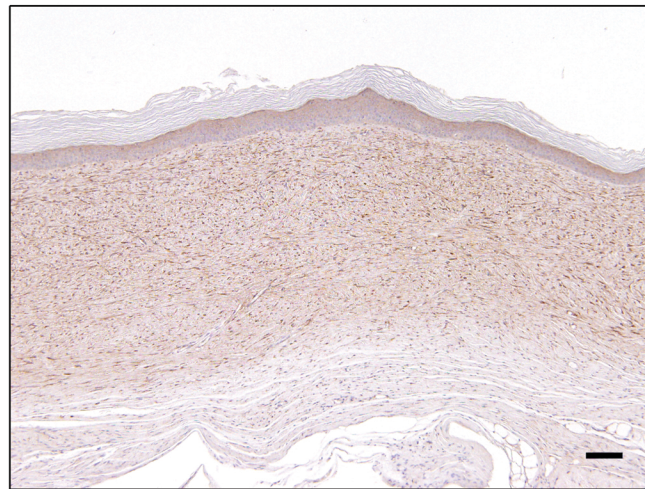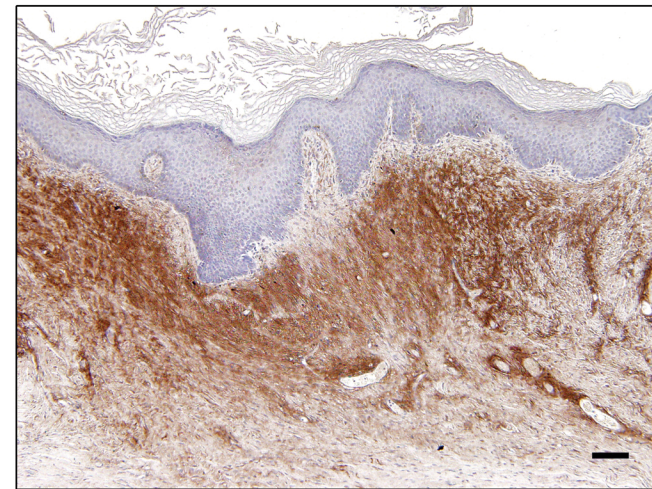

Supplement: gox-5-e1304-s005.pdf [file gox-5-e1304-s005.pdf]
